# Supplementary material for: Economic Evaluation of the Indoor Environmental Quality of Buildings: The Noise Pollution Effects on Housing Prices in the City of Bari (Italy)
Source: MDPI journal article supplement (doi:10.3390/buildings11050213), 2021-05-19
Supplement: s1 [file s1]

Supplementary Materials

# Economic evaluation of the indoor environmental quality of buildings. The noise pollution effects on housing prices in the city of Bari (Italy)

Pierluigi Morano <sup>1</sup>, Francesco Tajani <sup>2</sup>, Felicia Di Liddo <sup>1,\*</sup> Michele Darò <sup>3</sup>

<sup>1</sup> Department of Civil, Environmental, Land, Building Engineering and Chemistry (DICATECh), Polytechnic University of Bari, Via Orabona 4, 70125 Bari, Italy; pierluigi.morano@poliba.it; felicia.diliddo@poliba.it

<sup>2</sup> Department of Architecture and Design, Sapienza University of Rome, Via Flaminia 359, 00196 Rome, Italy; francesco.tajani@uniroma1.it

<sup>3</sup> Mi.Da - Sound Design, Via Porro 9, 10064 Pinerolo (TO), Italy; michele.daro@awn.it

\* Correspondence: felicia.diliddo@poliba.it

Academic Editors: Alessandro Cannavale, Francesco Martellotta and Francesco Fiorito

Received: 5 May 2021

Accepted: 16 May 2021

Published: 19 May 2021

**Publisher's Note:** MDPI stays neutral with regard to jurisdictional claims in published maps and institutional affiliations.

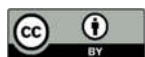

**Copyright:** © 2021 by the author. Licensee MDPI, Basel, Switzerland.

This article is an open access article distributed under the terms and conditions of the Creative Commons Attribution (CC BY) license (<http://creativecommons.org/licenses/by/4.0/>).

| Variable                                                                                                                       | Mean    | Standard Deviation | Levels/Intervals | Frequene [%] |
|--------------------------------------------------------------------------------------------------------------------------------|---------|--------------------|------------------|--------------|
| Total selling price [€]                                                                                                        | 203,640 | 112,819            |                  |              |
|                                                                                                                                | 97.88   | 38.87              |                  |              |
| Total surface of the property<br>[m²]                                                                                          |         |                    | <60              | 0.16         |
|                                                                                                                                |         |                    | 60-90            | 0.28         |
|                                                                                                                                |         |                    | 90-110           | 0.20         |
|                                                                                                                                |         |                    | 110-150          | 0.23         |
|                                                                                                                                |         |                    | >150             | 0.13         |
|                                                                                                                                | 1.35    | 0.50               |                  |              |
| Number of bathrooms [n]                                                                                                        |         |                    | 1                | 0.66         |
|                                                                                                                                |         |                    | 2                | 0.33         |
|                                                                                                                                |         |                    | 3                | 0.01         |
|                                                                                                                                |         |                    |                  |              |
|                                                                                                                                | 3.03    | 2.12               |                  |              |
| Floor level [n.]                                                                                                               |         |                    | 0                | 0.045        |
|                                                                                                                                |         |                    | 1                | 0.29         |
|                                                                                                                                |         |                    | 2                | 0.125        |
|                                                                                                                                |         |                    | 3                | 0.18         |
|                                                                                                                                |         |                    | 4                | 0.125        |
|                                                                                                                                |         |                    | 5                | 0.07         |
|                                                                                                                                |         |                    | 6                | 0.095        |
|                                                                                                                                |         |                    | >6               | 0.07         |
|                                                                                                                                |         |                    |                  |              |
| Presence of lift<br>[1-presence, 0-absence]                                                                                    | 0.71    | 0.45               |                  |              |
|                                                                                                                                |         |                    | 0                | 0.29         |
|                                                                                                                                |         |                    | 1                | 0.71         |
| Presence of the parking<br>[1-presence, 0-absence]                                                                             | 0.20    | 0.40               |                  |              |
|                                                                                                                                |         |                    | 0                | 0.81         |
|                                                                                                                                |         |                    | 1                | 0.19         |
| Quality of the maintenance<br>conditions [scores scale: 1- to<br>be restructured; 3- fit for hab-<br>itation; 5- restructured] | 2.94    | 1.64               |                  |              |
|                                                                                                                                |         |                    | 1                | 0.35         |
|                                                                                                                                |         |                    | 3                | 0.33         |
|                                                                                                                                |         |                    | 5                | 0.32         |
|                                                                                                                                | 1.62    | 0.69               |                  |              |
| Distance from the waterfront<br>[Km by walking]                                                                                |         |                    | 0.25-0.6         | 0.065        |
|                                                                                                                                |         |                    | 0.6-1.0          | 0.085        |
|                                                                                                                                |         |                    | 1.0-1.5          | 0.30         |
|                                                                                                                                |         |                    | 1.5-2.0          | 0.245        |
|                                                                                                                                |         |                    | 2.0-2.5          | 0.22         |
|                                                                                                                                |         |                    | 2.5-4.0          | 0.085        |
|                                                                                                                                |         |                    |                  |              |
| Maintenance conditions of<br>the public spaces adjacent to                                                                     | 2.85    | 1.23               |                  |              |
|                                                                                                                                |         |                    | 1                | 0.23         |

|                                                                                                                                                        |          |       |
|--------------------------------------------------------------------------------------------------------------------------------------------------------|----------|-------|
| the property [scores scale: 1- to be restructured; 3- fit for habitation; 5- restructured]                                                             | 3        | 0.62  |
|                                                                                                                                                        | 5        | 0.15  |
|                                                                                                                                                        | 0.42     | 0.30  |
| Distance from the nearest food market or grocery shop [Km by walking]                                                                                  | 0.1-0.2  | 0.13  |
|                                                                                                                                                        | 0.2-0.3  | 0.22  |
|                                                                                                                                                        | 0.3-0.5  | 0.36  |
|                                                                                                                                                        | 0.5-0.7  | 0.16  |
|                                                                                                                                                        | >0.7     | 0.13  |
| Maintenance conditions of the buildings facades adjacent to the property [scores scale: 1- to be restructured; 3- fit for habitation; 5- restructured] | 2.90     | 1.26  |
|                                                                                                                                                        | 1        | 0.22  |
|                                                                                                                                                        | 3        | 0.60  |
|                                                                                                                                                        | 5        | 0.18  |
| Road private and public vehicular traffic level [scores scale: 1- to be restructured; 3- fit for habitation; 5- restructured]                          | 0.95     | 0.42  |
|                                                                                                                                                        | 1        | 0.355 |
|                                                                                                                                                        | 3        | 0.44  |
|                                                                                                                                                        | 5        | 0.205 |
|                                                                                                                                                        | 2.70     | 1.47  |
| Distance from the nearest public green space [Km by walking]                                                                                           | 0.02-0.5 | 0.14  |
|                                                                                                                                                        | 0.5-0.8  | 0.195 |
|                                                                                                                                                        | 0.8-1.0  | 0.14  |
|                                                                                                                                                        | 1.0-1.2  | 0.195 |
|                                                                                                                                                        | 1.2-1.5  | 0.24  |
|                                                                                                                                                        | >1.5     | 0.09  |
|                                                                                                                                                        | 3.58     | 0.98  |
| Distance from the nearest highway [km by car]                                                                                                          | 1.2-2.0  | 0.065 |
|                                                                                                                                                        | 2.0-3.0  | 0.19  |
|                                                                                                                                                        | 3.0-3.5  | 0.175 |
|                                                                                                                                                        | 3.5-4.0  | 0.185 |
|                                                                                                                                                        | 4.5-5.0  | 0.32  |
|                                                                                                                                                        | >5.0     | 0.065 |
|                                                                                                                                                        | 2.09     | 0.65  |
| Distance from the nearest railway station [Km by walking]                                                                                              | 0.65-1.5 | 0.165 |
|                                                                                                                                                        | 1.5-2.0  | 0.255 |
|                                                                                                                                                        | 2.0-2.5  | 0.35  |
|                                                                                                                                                        | 2.5-3.0  | 0.10  |
|                                                                                                                                                        | >3.0     | 0.13  |
| Perceived environmental quality level of the area in                                                                                                   | 2.79     | 0.48  |
|                                                                                                                                                        | 1.9-2.4  | 0.17  |

|                                                                       |       |           |       |
|-----------------------------------------------------------------------|-------|-----------|-------|
| which the property is located<br>[scores scale from 1 to 5]           |       | 2.4-3.0   | 0.53  |
|                                                                       |       | 3.0-4.0   | 0.25  |
|                                                                       |       | >4.0      | 0.05  |
| Sound level in the street<br>where the property is located<br>[dB(A)] | 64.80 | 6.85      |       |
|                                                                       |       | ≤40       | 0.01  |
|                                                                       |       | >40 - ≤50 | 0.045 |
|                                                                       |       | >50 - ≤55 | 0.045 |
|                                                                       |       | >55 - ≤60 | 0.265 |
|                                                                       |       | >60 - ≤65 | 0.27  |
|                                                                       |       | >65 - ≤70 | 0.23  |
|                                                                       |       | >70 ≤75   | 0.135 |

**Table S1.** Descriptive statistics of the variables for the municipal OMI central area

| Variable                                           | Mean    | Standard Deviation | Levels/Intervals | Frequency [%] |
|----------------------------------------------------|---------|--------------------|------------------|---------------|
| Total selling price [€]                            | 228,635 | 110,130            |                  |               |
| Total surface of the property<br>[m²]              | 105.95  | 35.86              |                  |               |
|                                                    |         |                    | <60              | 0.05          |
|                                                    |         |                    | 60-90            | 0.27          |
|                                                    |         |                    | 90-110           | 0.22          |
|                                                    |         |                    | 110-150          | 0.38          |
|                                                    |         |                    | >150             | 0.08          |
| Number of bathrooms [n]                            | 1.43    | 0.55               |                  |               |
|                                                    |         |                    | 1                | 0.60          |
|                                                    |         |                    | 2                | 0.38          |
|                                                    |         |                    | 3                | 0.02          |
| Floor level [n.]                                   | 2.70    | 1.93               |                  |               |
|                                                    |         |                    | 1                | 0.37          |
|                                                    |         |                    | 2                | 0.18          |
|                                                    |         |                    | 3                | 0.21          |
|                                                    |         |                    | 4                | 0.06          |
|                                                    |         |                    | 5                | 0.11          |
|                                                    |         |                    | 6                | 0.03          |
|                                                    |         |                    | >6               | 0.04          |
| Presence of lift<br>[1-presence, 0-absence]        | 0.71    | 0.45               |                  |               |
|                                                    |         |                    | 0                | 0.29          |
|                                                    |         |                    | 1                | 0.71          |
| Presence of the parking<br>[1-presence, 0-absence] | 0.49    | 0.50               |                  |               |
|                                                    |         |                    | 0                | 0.51          |

|                                                                                                                                                        |      |      |          |      |
|--------------------------------------------------------------------------------------------------------------------------------------------------------|------|------|----------|------|
|                                                                                                                                                        |      |      | 1        | 0.49 |
| Quality of the maintenance conditions [scores scale: 1- to be restructured; 3- fit for habitation; 5- restructured]                                    | 2.70 | 1.53 |          |      |
|                                                                                                                                                        |      |      | 1        | 0.38 |
|                                                                                                                                                        |      |      | 3        | 0.40 |
|                                                                                                                                                        |      |      | 5        | 0.22 |
|                                                                                                                                                        | 3.20 | 0.61 |          |      |
|                                                                                                                                                        |      |      | 2.2-2.5  | 0.08 |
| Distance from the waterfront [Km by walking]                                                                                                           |      |      | 2.5-3.0  | 0.34 |
|                                                                                                                                                        |      |      | 3.0-3.5  | 0.29 |
|                                                                                                                                                        |      |      | 3.5-4.0  | 0.14 |
|                                                                                                                                                        |      |      | 4.5-5.0  | 0.15 |
| Maintenance conditions of the public spaces adjacent to the property [scores scale: 1- to be restructured; 3- fit for habitation; 5- restructured]     | 2.57 | 1.53 |          |      |
|                                                                                                                                                        |      |      | 1        | 0.42 |
|                                                                                                                                                        |      |      | 3        | 0.37 |
|                                                                                                                                                        |      |      | 5        | 0.21 |
|                                                                                                                                                        | 0.50 | 0.33 |          |      |
| Distance from the nearest food market or grocery shop [Km by walking]                                                                                  |      |      | 0.1-0.25 | 0.19 |
|                                                                                                                                                        |      |      | 0.25-0.5 | 0.35 |
|                                                                                                                                                        |      |      | 0.5-0.7  | 0.27 |
|                                                                                                                                                        |      |      | 0.7-1.0  | 0.16 |
|                                                                                                                                                        |      |      | 1.0-2.5  | 0.03 |
| Maintenance conditions of the buildings facades adjacent to the property [scores scale: 1- to be restructured; 3- fit for habitation; 5- restructured] | 3.02 | 1.16 |          |      |
|                                                                                                                                                        |      |      | 1        | 0.16 |
|                                                                                                                                                        |      |      | 3        | 0.66 |
|                                                                                                                                                        |      |      | 5        | 0.18 |
| Road private and public vehicular traffic level [scores scale: 1- to be restructured; 3- fit for habitation; 5- restructured]                          | 1.21 | 0.62 |          |      |
|                                                                                                                                                        |      |      | 1        | 0.16 |
|                                                                                                                                                        |      |      | 3        | 0.51 |
|                                                                                                                                                        |      |      | 5        | 0.33 |
|                                                                                                                                                        | 3.35 | 1.36 |          |      |
|                                                                                                                                                        |      |      | 0.04-0.5 | 0.08 |
| Distance from the nearest public green space [Km by walking]                                                                                           |      |      | 0.5-0.7  | 0.12 |
|                                                                                                                                                        |      |      | 0.7-1.0  | 0.17 |
|                                                                                                                                                        |      |      | 1.0-1.5  | 0.29 |
|                                                                                                                                                        |      |      | 1.5-2.0  | 0.22 |
|                                                                                                                                                        |      |      | 2.0-3.5  | 0.12 |
|                                                                                                                                                        | 1.75 | 0.69 |          |      |

|                                                                                                               |       |          |      |
|---------------------------------------------------------------------------------------------------------------|-------|----------|------|
| Distance from the nearest highway [km by car]                                                                 |       | 0.35-1.0 | 0.12 |
|                                                                                                               |       | 1.0-1.5  | 0.16 |
|                                                                                                               |       | 1.5-2.0  | 0.28 |
|                                                                                                               |       | 2.0-2.5  | 0.29 |
|                                                                                                               |       | 2.5-3.2  | 0.15 |
| Distance from the nearest railway station [Km by walking]                                                     | 3.64  | 0.85     |      |
|                                                                                                               |       | 2.7-3.0  | 0.16 |
|                                                                                                               |       | 3.0-3.5  | 0.39 |
|                                                                                                               |       | 3.5-4.0  | 0.25 |
|                                                                                                               |       | 4.0-4.5  | 0.09 |
|                                                                                                               |       | 4.5-6.0  | 0.06 |
|                                                                                                               |       | 6.0-7.1  | 0.05 |
| Perceived environmental quality level of the area in which the property is located [scores scale from 1 to 5] | 3.29  | 0.44     |      |
|                                                                                                               |       | 2.4-3.0  | 0.24 |
|                                                                                                               |       | 3.0-3.5  | 0.29 |
|                                                                                                               |       | 3.5-4.0  | 0.44 |
|                                                                                                               |       | 4.0-4.2  | 0.03 |
| Sound level in the street where the property is located [dB(A)]                                               | 62.90 | 6.57     |      |
|                                                                                                               |       | ≤40      | 0.00 |
|                                                                                                               |       | >40 ≤50  | 0.04 |
|                                                                                                               |       | >50 ≤55  | 0.17 |
|                                                                                                               |       | >55 ≤60  | 0.31 |
|                                                                                                               |       | >60 ≤65  | 0.25 |
|                                                                                                               |       | >65 ≤70  | 0.13 |
|                                                                                                               |       | >70 ≤75  | 0.10 |

Table S2. Descriptive statistics of the variables for the municipal OMI semicentral area

| Variable                           | Mean    | Standard Deviation | Levels/Intervals | Frequency [%] |
|------------------------------------|---------|--------------------|------------------|---------------|
| Total selling price [€]            | 208,668 | 82.145             |                  |               |
|                                    | 103.26  | 37.06              |                  |               |
| Total surface of the property [m²] |         |                    | <60              | 0.11          |
|                                    |         |                    | 60-90            | 0.24          |
|                                    |         |                    | 90-110           | 0.23          |
|                                    |         |                    | 110-150          | 0.36          |
|                                    |         |                    | >150             | 0.06          |
| Number of bathrooms [n]            | 1.51    | 0.56               |                  |               |
|                                    |         |                    | 1                | 0.52          |
|                                    |         |                    | 2                | 0.45          |
|                                    |         |                    | 3                | 0.03          |

|                                                                                                                                                                |      |      |          |      |
|----------------------------------------------------------------------------------------------------------------------------------------------------------------|------|------|----------|------|
| Floor level [n.]                                                                                                                                               | 2.80 | 2.08 |          |      |
|                                                                                                                                                                |      |      | 0        | 0.05 |
|                                                                                                                                                                |      |      | 1        | 0.28 |
|                                                                                                                                                                |      |      | 2        | 0.17 |
|                                                                                                                                                                |      |      | 3        | 0.23 |
|                                                                                                                                                                |      |      | 4        | 0.08 |
|                                                                                                                                                                |      |      | 5        | 0.08 |
|                                                                                                                                                                |      |      | 6        | 0.03 |
|                                                                                                                                                                |      |      | >6       | 0.08 |
| Presence of lift<br>[1-presence, 0-absence]                                                                                                                    | 0.83 | 0.38 |          |      |
|                                                                                                                                                                |      |      | 0        | 0.17 |
|                                                                                                                                                                |      |      | 1        | 0.83 |
| Presence of the parking<br>[1-presence, 0-absence]                                                                                                             | 0.78 | 0.41 |          |      |
|                                                                                                                                                                |      |      | 0        | 0.22 |
|                                                                                                                                                                |      |      | 1        | 0.78 |
| Quality of the maintenance<br>conditions [scores scale: 1- to<br>be restructured; 3- fit for hab-<br>itation; 5- restructured]                                 | 3.13 | 1.59 |          |      |
|                                                                                                                                                                |      |      | 1        | 0.28 |
|                                                                                                                                                                |      |      | 3        | 0.37 |
|                                                                                                                                                                |      |      | 5        | 0.35 |
| Distance from the waterfront<br>[Km by walking]                                                                                                                | 5.21 | 1.22 |          |      |
|                                                                                                                                                                |      |      | 1.7-4.0  | 0.14 |
|                                                                                                                                                                |      |      | 4.0-5.0  | 0.34 |
|                                                                                                                                                                |      |      | 5.0-5.5  | 0.12 |
|                                                                                                                                                                |      |      | 5.5-6.0  | 0.15 |
|                                                                                                                                                                |      |      | 6.0-10.0 | 0.25 |
| Maintenance conditions of<br>the public spaces adjacent to<br>the property [scores scale: 1-<br>to be restructured; 3- fit for<br>habitation; 5- restructured] | 1.81 | 0.98 |          |      |
|                                                                                                                                                                |      |      | 1        | 0.59 |
|                                                                                                                                                                |      |      | 3        | 0.40 |
|                                                                                                                                                                |      |      | 5        | 0.01 |
| Distance from the nearest<br>food market or grocery shop<br>[Km by walking]                                                                                    | 1.10 | 1.09 |          |      |
|                                                                                                                                                                |      |      | 0.02-0.5 | 0.35 |
|                                                                                                                                                                |      |      | 0.5-0.8  | 0.22 |
|                                                                                                                                                                |      |      | 0.8-1.2  | 0.18 |
|                                                                                                                                                                |      |      | 1.2-3.0  | 0.10 |
|                                                                                                                                                                |      |      | 3.0-4.8  | 0.15 |
| Maintenance conditions of<br>the buildings facades adjacent                                                                                                    | 2.90 | 1.38 |          |      |
|                                                                                                                                                                |      |      | 1        | 0.26 |

|                                                                                                                               |       |      |          |      |
|-------------------------------------------------------------------------------------------------------------------------------|-------|------|----------|------|
| to the property [scores scale: 1- to be restructured; 3- fit for habitation; 5- restructured]                                 |       |      | 3        | 0.52 |
|                                                                                                                               |       |      | 5        | 0.22 |
| Road private and public vehicular traffic level [scores scale: 1- to be restructured; 3- fit for habitation; 5- restructured] | 3.15  | 1.35 |          |      |
|                                                                                                                               |       |      | 1        | 0.18 |
|                                                                                                                               |       |      | 3        | 0.43 |
|                                                                                                                               |       |      | 5        | 0.39 |
|                                                                                                                               | 3.41  | 1.46 |          |      |
| Distance from the nearest public green space [Km by walking]                                                                  |       |      | 0.45-1.0 | 0.05 |
|                                                                                                                               |       |      | 1.0-2.0  | 0.14 |
|                                                                                                                               |       |      | 2.0-3.0  | 0.19 |
|                                                                                                                               |       |      | 3.0-4.0  | 0.42 |
|                                                                                                                               |       |      | 4.0-6.3  | 0.20 |
|                                                                                                                               | 1.48  | 0.59 |          |      |
| Distance from the nearest highway [km by car]                                                                                 |       |      | 0.1-1.0  | 0.09 |
|                                                                                                                               |       |      | 1.0-1.5  | 0.62 |
|                                                                                                                               |       |      | 1.5-2.0  | 0.13 |
|                                                                                                                               |       |      | 2.0-2.5  | 0.10 |
|                                                                                                                               |       |      | 2.5-3.5  | 0.06 |
|                                                                                                                               | 6.15  | 1.55 |          |      |
| Distance from the nearest railway station [Km by walking]                                                                     |       |      | 3.4-4.5  | 0.11 |
|                                                                                                                               |       |      | 4.5-5.0  | 0.12 |
|                                                                                                                               |       |      | 5.0-5.5  | 0.24 |
|                                                                                                                               |       |      | 5.5-6.5  | 0.16 |
|                                                                                                                               |       |      | 6.5-7.5  | 0.14 |
|                                                                                                                               |       |      | 7.5-10.5 | 0.23 |
| Perceived environmental quality level of the area in which the property is located [scores scale from 1 to 5]                 | 2.55  | 0.29 |          |      |
|                                                                                                                               |       |      | 2.2-2.5  | 0.34 |
|                                                                                                                               |       |      | 2.5-2.7  | 0.40 |
|                                                                                                                               |       |      | 2.7-3.0  | 0.08 |
|                                                                                                                               |       |      | 3.0-3.1  | 0.18 |
|                                                                                                                               | 59.12 | 7.58 |          |      |
| Sound level in the street where the property is located [dB(A)]                                                               |       |      | ≤40      | 0.00 |
|                                                                                                                               |       |      | >40 -≤50 | 0.26 |
|                                                                                                                               |       |      | >50 -≤55 | 0.14 |
|                                                                                                                               |       |      | >55 -≤60 | 0.33 |
|                                                                                                                               |       |      | >60 -≤65 | 0.13 |
|                                                                                                                               |       |      | >65 -≤70 | 0.04 |
|                                                                                                                               |       |      | >70 -≤75 | 0.10 |

**Table S3.** Descriptive statistics of the variables for the municipal OMI peripheral area



| Variable                                                                                                                       | Mean    | Standard Deviation | Levels/Intervals | Frequency [%] |
|--------------------------------------------------------------------------------------------------------------------------------|---------|--------------------|------------------|---------------|
| Total selling price [€]                                                                                                        | 146,421 | 45,529             |                  |               |
|                                                                                                                                | 89.67   | 25.31              |                  |               |
| Total surface of the property<br>[m²]                                                                                          |         |                    | <60              | 0.11          |
|                                                                                                                                |         |                    | 60-90            | 0.38          |
|                                                                                                                                |         |                    | 90-110           | 0.29          |
|                                                                                                                                |         |                    | 110-150          | 0.20          |
|                                                                                                                                |         |                    | >150             | 0.02          |
| Number of bathrooms [n]                                                                                                        | 1.30    | 0.46               |                  |               |
|                                                                                                                                |         |                    | 1                | 0.70          |
|                                                                                                                                |         |                    | 2                | 0.30          |
|                                                                                                                                |         |                    | 3                | 0.00          |
|                                                                                                                                |         |                    |                  |               |
| Floor level [n.]                                                                                                               | 3.20    | 2.52               |                  |               |
|                                                                                                                                |         |                    | 1                | 0.065         |
|                                                                                                                                |         |                    | 2                | 0.265         |
|                                                                                                                                |         |                    | 3                | 0.16          |
|                                                                                                                                |         |                    | 4                | 0.16          |
|                                                                                                                                |         |                    | 5                | 0.075         |
|                                                                                                                                |         |                    | 6                | 0.065         |
|                                                                                                                                |         |                    | 7                | 0.055         |
|                                                                                                                                |         |                    | >7               | 0.155         |
| Presence of lift<br>[1-presence, 0-absence]                                                                                    | 0.75    | 0.43               |                  |               |
|                                                                                                                                |         |                    | 0                | 0.25          |
|                                                                                                                                |         |                    | 1                | 0.75          |
| Presence of the parking<br>[1-presence, 0-absence]                                                                             | 0.75    | 0.43               |                  |               |
|                                                                                                                                |         |                    | 0                | 0.245         |
|                                                                                                                                |         |                    | 1                | 0.755         |
| Quality of the maintenance<br>conditions [scores scale: 1- to<br>be restructured; 3- fit for hab-<br>itation; 5- restructured] | 3.33    | 1.54               |                  |               |
|                                                                                                                                |         |                    | 1                | 0.225         |
|                                                                                                                                |         |                    | 3                | 0.375         |
|                                                                                                                                |         |                    | 5                | 0.40          |
| Distance from the waterfront<br>[Km by walking]                                                                                | 8.18    | 2.03               |                  |               |
|                                                                                                                                |         |                    | 3.3-6.0          | 0.105         |
|                                                                                                                                |         |                    | 6.0-7.0          | 0.125         |
|                                                                                                                                |         |                    | 7.0-8.0          | 0.14          |
|                                                                                                                                |         |                    | 8.0-9.0          | 0.38          |

|                                                                                                                                                        |      |      |           |       |
|--------------------------------------------------------------------------------------------------------------------------------------------------------|------|------|-----------|-------|
|                                                                                                                                                        |      |      | 9.0-10.0  | 0.165 |
|                                                                                                                                                        |      |      | 10.0-15.6 | 0.085 |
| Maintenance conditions of the public spaces adjacent to the property [scores scale: 1- to be restructured; 3- fit for habitation; 5- restructured]     | 2.76 | 1.31 |           |       |
|                                                                                                                                                        |      |      | 1         | 0.28  |
|                                                                                                                                                        |      |      | 3         | 0.56  |
|                                                                                                                                                        |      |      | 5         | 0.16  |
|                                                                                                                                                        | 0.67 | 0.51 |           |       |
|                                                                                                                                                        |      |      | 0.1-0.4   | 0.34  |
| Distance from the nearest food market or grocery shop [Km by walking]                                                                                  |      |      | 0.4-0.6   | 0.23  |
|                                                                                                                                                        |      |      | 0.6-0.8   | 0.05  |
|                                                                                                                                                        |      |      | 0.8-1.0   | 0.09  |
|                                                                                                                                                        |      |      | 1.0-1.5   | 0.19  |
|                                                                                                                                                        |      |      | 1.5-2.4   | 0.10  |
| Maintenance conditions of the buildings facades adjacent to the property [scores scale: 1- to be restructured; 3- fit for habitation; 5- restructured] | 2.68 | 1.30 |           |       |
|                                                                                                                                                        |      |      | 1         | 0.31  |
|                                                                                                                                                        |      |      | 3         | 0.55  |
|                                                                                                                                                        |      |      | 5         | 0.14  |
| Road private and public vehicular traffic level [scores scale: 1- to be restructured; 3- fit for habitation; 5- restructured]                          | 2.41 | 1.98 |           |       |
|                                                                                                                                                        |      |      | 1         | 0.155 |
|                                                                                                                                                        |      |      | 3         | 0.525 |
|                                                                                                                                                        |      |      | 5         | 0.32  |
|                                                                                                                                                        | 3.33 | 1.35 |           |       |
|                                                                                                                                                        |      |      | 0.2-0.7   | 0.145 |
| Distance from the nearest public green space [Km by walking]                                                                                           |      |      | 0.7-1.5   | 0.325 |
|                                                                                                                                                        |      |      | 1.5-2.0   | 0.13  |
|                                                                                                                                                        |      |      | 2.0-3.5   | 0.135 |
|                                                                                                                                                        |      |      | 3.5-5.0   | 0.135 |
|                                                                                                                                                        |      |      | 5.0-8.0   | 0.09  |
|                                                                                                                                                        |      |      | 8.0-9.3   | 0.04  |
|                                                                                                                                                        | 2.69 | 1.23 |           |       |
|                                                                                                                                                        |      |      | 0.2-0.5   | 0.12  |
| Distance from the nearest highway [km by car]                                                                                                          |      |      | 0.5-2.0   | 0.115 |
|                                                                                                                                                        |      |      | 2.0-3.0   | 0.315 |
|                                                                                                                                                        |      |      | 3.0-3.5   | 0.155 |
|                                                                                                                                                        |      |      | 3.5-4.5   | 0.225 |
|                                                                                                                                                        |      |      | 4.5-6.0   | 0.07  |
|                                                                                                                                                        | 8.59 | 2.22 |           |       |
|                                                                                                                                                        |      |      | 3.3-6.5   | 0.14  |

|                                                                                                               |           |      |       |
|---------------------------------------------------------------------------------------------------------------|-----------|------|-------|
| Distance from the nearest railway station [Km by walking]                                                     | 6.5-8.0   |      | 0.21  |
|                                                                                                               | 8.0-8.5   |      | 0.13  |
|                                                                                                               | 8.5-9.0   |      | 0.235 |
|                                                                                                               | 9.0-10.0  |      | 0.125 |
|                                                                                                               | 10.0-13.5 |      | 0.13  |
|                                                                                                               | 13.5-18.4 |      | 0.03  |
| Perceived environmental quality level of the area in which the property is located [scores scale from 1 to 5] | 3.08      | 0.49 |       |
|                                                                                                               | 1.7-2.5   |      | 0.06  |
|                                                                                                               | 2.5-3.0   |      | 0.40  |
|                                                                                                               | 3.0-3.5   |      | 0.31  |
|                                                                                                               | 3.5-4.0   |      | 0.23  |
| Sound level in the street where the property is located [dB(A)]                                               | 57.02     | 5.91 |       |
|                                                                                                               | ≤40       |      | 0.00  |
|                                                                                                               | >40 -≤50  |      | 0.25  |
|                                                                                                               | >50 -≤55  |      | 0.33  |
|                                                                                                               | >55 -≤60  |      | 0.255 |
|                                                                                                               | >60 -≤65  |      | 0.125 |
|                                                                                                               | >65 -≤70  |      | 0.02  |
|                                                                                                               | >70 -≤75  |      | 0.02  |

**Table S4.** Descriptive statistics of the variables for the municipal OMI suburban area
